# Supplementary material for: Mitochondrial DNA D-Loop Diversity of the Helmeted Guinea Fowls in Kenya and Its Implications on HSP70 Gene Functional Polymorphism
Source: Hindawi journal article supplement (doi:10.1155/2018/7314038), 2018-11-13
Supplement: f1 [file 7314038.f1.pdf]

## Supplementary information

**Table S1:** Genbank accession numbers for mtDNA reference sequences of Nigerian, Kenyan and Chinese domesticated helmeted Guinea fowls and other published sequences

| Sequence        | Accession number | Sequence         | Accession number |
|-----------------|------------------|------------------|------------------|
| Isolate_783_KA4 | KP218433         | Isolate_750_KE1  | KP218405         |
| Isolate_781_KA5 | KP218432         | Isolate_75_LO1   | KP218404         |
| Isolate_780_KA5 | KP218431         | Isolate_749_KE1  | KP218403         |
| Isolate_78_LO1  | KP218430         | Isolate_747_KE5  | KP218402         |
| Isolate_746_KE6 | KP218401         | Isolate_665_KEN1 | KP218358         |
| Isolate_745_KE6 | KP218400         | Isolate_660_KEN1 | KP218357         |
| Isolate_744_KE4 | KP218399         | Isolate_66_AK3   | KP218356         |
| Isolate_743_KE1 | KP218398         | Isolate_659_KEN1 | KP218355         |
| Isolate_729_KE6 | KP218382         | Isolate_65_AK3   | KP218354         |
| Isolate_728_KE5 | KP218381         | Isolate_64_AK2   | KP218353         |
| Isolate_727_KE6 | KP218380         | Isolate_63_AK3   | KP218352         |
| Isolate_726_KE6 | KP218379         | Isolate_62_AK3   | KP218351         |
| Isolate_725_KE5 | KP218378         | Isolate_61_AK3   | KP218350         |
| Isolate_724_KE5 | KP218377         | Isolate_60_AK2   | KP218349         |
| Isolate_723_KE5 | KP218376         | Isolate_6_KAT1   | KP218348         |
| Isolate_721_KE4 | KP218375         | Isolate_59_AK2   | KP218347         |
| Isolate_720_KE4 | KP218374         | Isolate_58_AK2   | KP218346         |
| Isolate_72_AK4  | KP218373         | Isolate_57_AK2   | KP218345         |
| Isolate_719_KE3 | KP218372         | Isolate_56_AK2   | KP218344         |
| Isolate_724_KE5 | KP218377         | Isolate_60_AK2   | KP218349         |
| Isolate_723_KE5 | KP218376         | Isolate_6_KAT1   | KP218348         |
| Isolate_721_KE4 | KP218375         | Isolate_59_AK2   | KP218347         |
| Isolate_720_KE4 | KP218374         | Isolate_58_AK2   | KP218346         |
| Isolate_72_AK4  | KP218373         | Isolate_57_AK2   | KP218345         |
| Isolate_719_KE3 | KP218372         | Isolate_56_AK2   | KP218344         |
| Isolate_717_KE2 | KP218371         | Isolate_55_AK2   | KP218343         |
| Isolate_716_KE1 | KP218370         | Isolate_54_AK1   | KP218342         |
| Isolate_714_KE2 | KP218369         | Isolate_53_AK1   | KP218341         |
| Isolate_713_KE1 | KP218368         | Isolate_52_AK1   | KP218340         |
| Isolate_712_KE2 | KP218367         | Isolate_51_AK1   | KP218339         |
| Isolate_711_KE1 | KP218366         | Isolate_50_TA5   | KP218338         |
| Isolate_71_AK4  | KP218365         | Isolate_5_KAT    | KP218337         |

| Sequence              | Accession number | Sequence                   | Accession number |
|-----------------------|------------------|----------------------------|------------------|
| Isolate_70_AK4        | KP218364         | Isolate_495_TA5            | KP218336         |
| Isolate_7_KAT1        | KP218363         | Isolate_493_TA5            | KP218335         |
| Isolate_69_AK2        | KP218362         | Isolate_492_TA5            | KP218334         |
| Isolate_717_KE2       | KP218371         | Isolate_55_AK2             | KP218343         |
| Isolate_713_KE1       | KP218368         | Isolate_52_AK1             | KP218340         |
| Isolate_712_KE2       | KP218367         | Isolate_51_AK1             | KP218339         |
| Isolate_711_KE1       | KP218366         | Isolate_50_TA5             | KP218338         |
| Isolate_71_AK4        | KP218365         | Isolate_5_KAT              | KP218337         |
| Isolate_70_AK4        | KP218364         | Isolate_495_TA5            | KP218336         |
| Isolate_7_KAT1        | KP218363         | Isolate_493_TA5            | KP218335         |
| Isolate_69_AK2        | KP218362         | Isolate_492_TA5            | KP218334         |
| Isolate_102_AK5       | KP218267         | isolate_734_KE2            | KP218388         |
| Isolate_101_AK5       | KP218266         | isolate_733_KE2            | KP218387         |
| Isolate_100_AK5       | KP218265         | isolate_732_KE2            | KP218386         |
| Isolate_10_KAT1       | KP218264         | isolate_731_KE2            | KP218385         |
| Isolate_1_KAT1        | KP218263         | isolate_730_KE5            | KP218384         |
| Isolate_742_KE3       | KP218397         | isolate_73_LO1             | KP218383         |
| Isolate_741_KE1       | KP218396         | Isolate_19546_CH           | KP218287         |
| Isolate_33_TA5        | KP218315         | Isolate_19545_CH           | KP218286         |
| Isolate_32_TA4        | KP218314         | Isolate_19544_CH           | KP218285         |
| Isolate_30_TA1        | KP218313         | Isolate_19543_CH           | KP218284         |
| Isolate_3_KAT1        | KP218312         | Isolate_19541_CH           | KP218283         |
| <i>N.m. meleagris</i> | NC_006382        | <i>Acrylium vulturinum</i> | NC_014180        |

**Table S2:** Frequencies of mtDNA haplotypes in the helmeted Guinea fowl populations in Kenya

| Haplotype | Bungma South | Teso North | Bungoma West | Mt. Elgon | Wild |
|-----------|--------------|------------|--------------|-----------|------|
| Hap1      | 0            | 0          | 1            | 0         | 0    |
| Hap2      | 2            | 0          | 4            | 2         | 0    |
| Hap3      | 0            | 0          | 1            | 0         | 0    |
| Hap4      | 4            | 8          | 5            | 13        | 0    |
| Hap5      | 0            | 0          | 2            | 0         | 0    |
| Hap6      | 0            | 1          | 1            | 0         | 0    |
| Hap7      | 1            | 0          | 1            | 4         | 0    |
| Hap8      | 2            | 3          | 1            | 0         | 0    |
| Hap9      | 1            | 1          | 1            | 1         | 0    |
| Hap10     | 0            | 0          | 1            | 0         | 0    |
| Hap11     | 1            | 1          | 0            | 1         | 0    |
| Hap12     | 0            | 1          | 0            | 0         | 0    |
| Hap13     | 0            | 1          | 0            | 0         | 0    |
| Hap14     | 1            | 1          | 0            | 0         | 0    |
| Hap15     | 0            | 1          | 0            | 0         | 0    |
| Hap16     | 1            | 0          | 0            | 0         | 0    |
| Hap17     | 0            | 0          | 0            | 0         | 2    |
| Hap18     | 0            | 0          | 0            | 0         | 6    |
| Hap19     | 0            | 0          | 0            | 0         | 1    |
| Hap20     | 0            | 0          | 0            | 0         | 2    |
| Hap21     | 0            | 0          | 0            | 0         | 1    |
| Hap22     | 0            | 0          | 0            | 0         | 5    |
| Hap23     | 0            | 0          | 0            | 0         | 1    |
| Hap24     | 0            | 0          | 0            | 0         | 1    |
| Hap25     | 0            | 0          | 0            | 0         | 1    |
| n         | 13           | 18         | 18           | 21        | 20   |

n= number of individuals

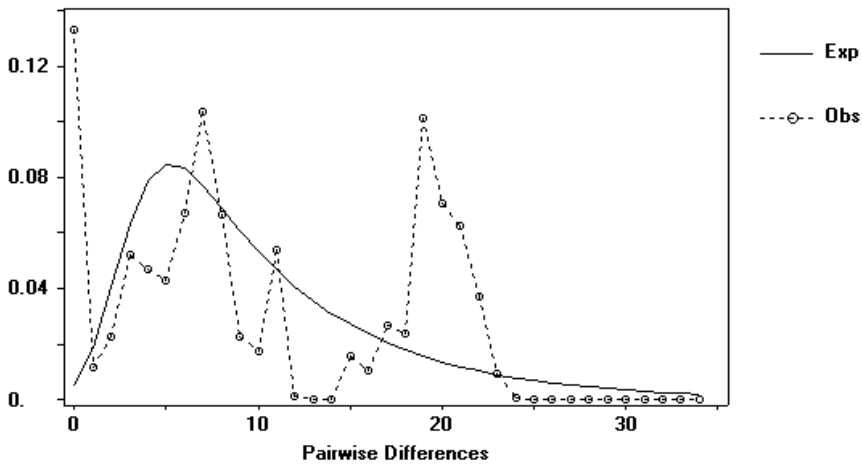

**Figure S1:** Observed and expected distributions of mtDNA pair-wise nucleotide differences (mismatches) under the model of growing-declining populations in the helmeted Guinea fowls in Kenya

**Table S3:** Summary of statistics about the demographic history of helmeted Guinea fowl populations in Kenya

| Population    | SSD (P-value)  | D (P-value)  | F <sub>s</sub> (P-value) |
|---------------|----------------|--------------|--------------------------|
| Bungoma South | 0.019 (0.486)  | 1.43 (0.942) | -0.39 (0.446)            |
| Teso North    | 0.041 (0.236)  | 1.68 (0.959) | -0.13 (0.455)            |
| Bungoma West  | 0.053 (0.031)* | 1.46 (0.943) | -1.11 (0.317)            |
| Mt. Elgon     | 0.145 (0.075)  | 0.99 (0.860) | 3.05 (0.915)             |
| Wild          | 0.040 (0.446)  | 0.15 (0.654) | 1.71 (0.807)             |

SSD= sum of squared differences; D= Tajima's statistics; F<sub>s</sub>= Fu's statistics; \*P<0.05

**Table S4:** Demographic and spatial expansion of the mtDNA haplotypes in the helmeted Guinea fowl populations in Kenya

| Population    | Demographic expansion |                    | Spatial expansion |                    |
|---------------|-----------------------|--------------------|-------------------|--------------------|
|               | Raggedness index      | Raggedness p value | Raggedness index  | Raggedness p value |
| Bungoma South | 0.0559                | 0.3860             | 0.0559            | 0.6770             |
| Teso North    | 0.0986                | 0.1890             | 0.0986            | 0.5680             |
| Bungoma West  | 0.1203                | 0.0210             | 0.1203            | 0.2570             |
| Mt. Elgon     | 0.2877                | 0.0110             | 0.2877            | 0.6440             |
| Wild          | 0.0753                | 0.1860             | 0.0753            | 0.3860             |

**Table S5:** Results from the mtDNA AMOVA of the five helmeted Guinea fowl populations in Kenya

| Source of variation | df | Sum of squares | Variance components | Percentage variation | F <sub>ST</sub> | P-value |
|---------------------|----|----------------|---------------------|----------------------|-----------------|---------|
| Among populations   | 4  | 230            | 3.05                | 51.5                 | 0.515           | 0.00    |
| Within populations  | 85 | 244            | 2.87                | 48.5                 |                 |         |

df= degrees of freedom

**Table S6:** Results from the mtDNA AMOVA of the wild and domesticated helmeted Guinea fowls in Kenya

| Source of Variation | df | Sum of squares | Variance components | Percentage variation | F <sub>ST</sub> | P-value |
|---------------------|----|----------------|---------------------|----------------------|-----------------|---------|
| Among populations   | 1  | 220            | 6.99                | 70.7                 | 0.707           | 0.00    |
| Within populations  | 88 | 254            | 2.89                | 29.3                 |                 |         |

df= degrees of freedom

**Table S7:** Results from the mtDNA AMOVA of the Teso South and Mt. Elgon, Bungoma West and Bungoma South, and the wild population in Kenya

| Source of Variation | df | Sum of squares | Variance components | Percentage variation | F <sub>ST</sub> | P-value |
|---------------------|----|----------------|---------------------|----------------------|-----------------|---------|
| Among populations   | 2  | 226            | 2.79                | 57.0                 | 0.570           | 0.00    |
| Within populations  | 87 | 249            | 2.86                | 43.0                 |                 |         |

df= degrees of freedom

**Table S8:** Description of the polymorphic sites of the HSP70 haplotypes in the helmeted Guinea fowls in Kenya

| Position (in bp) |    |    |     |
|------------------|----|----|-----|
| Haplotype        | 42 | 60 | 264 |
| TGC              | T  | G  | C   |
| TAC              | T  | A  | C   |
| TGT              | T  | G  | T   |
| CGC              | C  | G  | C   |

A: adenine; G: guanine; C: cytosine; T: thymine

**Table S9:** Relative frequencies of HSP70 haplotypes in the helmeted Guinea fowl populations in Kenya

| Haplotype | Bungoma<br>South | Teso<br>North | Bungoma<br>West | Mt. Elgon | Wild |
|-----------|------------------|---------------|-----------------|-----------|------|
| TGC       | 1.00             | 0.875         | 1.00            | 1.00      | 0.70 |
| TAC       | 0.00             | 0.125         | 0.00            | 0.00      | 0.00 |
| TGT       | 0.00             | 0.00          | 0.00            | 0.00      | 0.25 |
| CGC       | 0.00             | 0.00          | 0.00            | 0.00      | 0.05 |

A: adenine; G: guanine; C: cytosine; T: thymine

**Table S10:** Result from the HSP70 AMOVA of the wild and domesticated helmeted Guinea fowls in Kenya

| Source of variation                 | df  | Sum of squares | Variance components | Percentage variation | P-value |
|-------------------------------------|-----|----------------|---------------------|----------------------|---------|
| Among populations                   | 1   | 4.06           | 0.319               | 29.3                 | 0.00    |
| Among individuals within population | 172 | 22.6           | 0.0542              | 49.6                 |         |
| Within individuals                  | 174 | 4.00           | 0.230               | 21.1                 |         |

df= degrees of freedom

**Table S11:** Result from the HSP70 AMOVA of the three groups; Teso South and Mt. Elgon, Bungoma West and Bungoma South, and the wild population of the helmeted Guinea fowls in Kenya

| Source of variation                 | df  | Sum of squares | Variance components | Percentage variation | P-value |
|-------------------------------------|-----|----------------|---------------------|----------------------|---------|
| Among populations                   | 2   | 4.25           | 0.0177              | 18.7                 | 0.00    |
| Among individuals within population | 171 | 22.4           | 0.0539              | 57.0                 |         |
| Within individuals                  | 174 | 4.00           | 0.0230              | 24.3                 |         |

df= degrees of freedom
